# Supplementary material for: Simple and sensitive colorimetric sensors for the selective detection of Cu(ii)
Source: Royal Society of Chemistry journal article supplement (doi:10.1039/d0ra09910d), 2021-01-01
Supplement: d0ra09910d1.pdf [file d0ra09910d1.pdf]

## Electronic Supplementary Information (ESI) for:

### Simple and Sensitive Colorimetric Sensors for the Selective Detection of Cu(II)

Meifang Liu, <sup>a\*</sup> Kequan Wang, <sup>b</sup> Hanlu Wang, <sup>c</sup> Jie Lu, <sup>a</sup> Shukang Xu, <sup>a</sup> Lulu Zhao, <sup>a</sup> Xilong Wang <sup>d</sup> and Junming Du <sup>d</sup>

<sup>a</sup> College of Chemistry-Chemical & Environmental Engineering, Weifang University, Weifang, 261061, P. R. China

E-mail: [liumf@iccas.ac.cn](mailto:liumf@iccas.ac.cn) (M. Liu)

Phone/Fax: +86-536-8785283

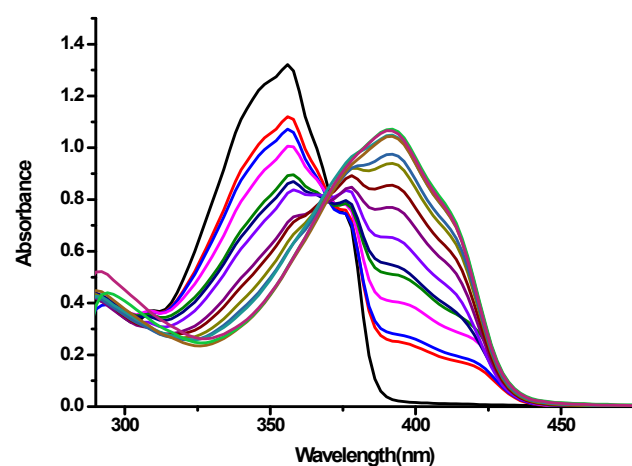

**Figure S1.** UV-vis absorption spectra of L ( $5.0 \times 10^{-5}$  M) in EtOH/H<sub>2</sub>O=4:1 solution upon addition Cu<sup>2+</sup> ( $0-7.5 \times 10^{-5}$  M) at room temperature.

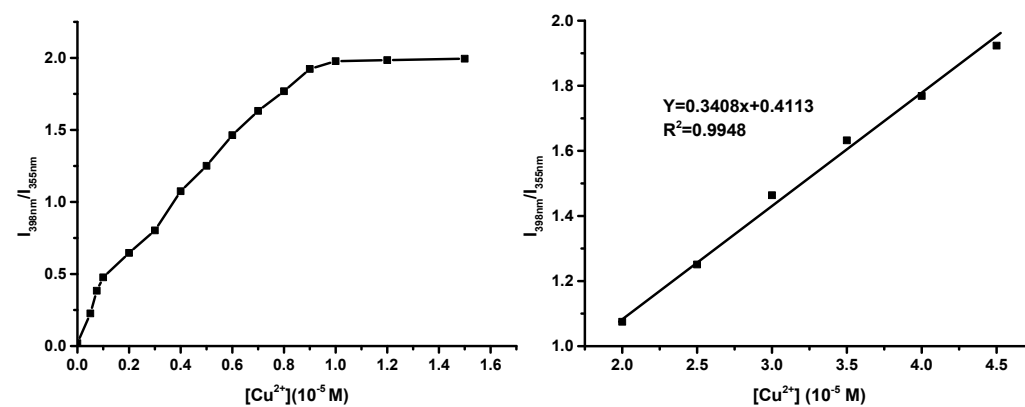

**Figure S2.** Plot of relative absorbance intensity  $I_{398\text{nm}}/I_{355\text{nm}}$  versus Cu<sup>2+</sup> ( $0-7.5 \times 10^{-5}$  M).

**Table S1.** Comparison of the recently reported sensors for the determination of Cu<sup>2+</sup>

| Cu <sup>2+</sup> -sensor                                                            | Detection limit (μM) | sensor                           | Operation mode | Working system                                    | interference                                           | Reference |
|-------------------------------------------------------------------------------------|----------------------|----------------------------------|----------------|---------------------------------------------------|--------------------------------------------------------|-----------|
| 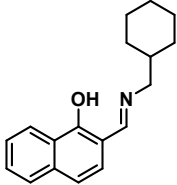   | 43.11                | Fluorescent Sensor               | Turn on        | CH <sub>3</sub> CN                                | Zn <sup>2+</sup>                                       | 54        |
|    | 8                    | Colorimetric /Fluorescent sensor | Turn on        | CH <sub>3</sub> CN/H <sub>2</sub> O (9:1, v/v)    | Al <sup>3+</sup>                                       | 55        |
|   | 0.16                 | Colorimetric Sensors             | Turn on        | CH <sub>3</sub> CN/H <sub>2</sub> O (V/V, 1:9)    | Fe <sup>3+</sup> , Cr <sup>3+</sup> , Al <sup>3+</sup> | 56        |
|  | 0.648                | Colorimetric sensor              | Turn on        | EtOH                                              | none                                                   | 57        |
|  | none                 | Colorimetric Sensors             | Turn on        | MeOH                                              | Al <sup>3+</sup> , Mn <sup>2+</sup>                    | 58        |
|  | 0.36                 | fluorescent probes               | Turn off       | CH <sub>3</sub> OH/H <sub>2</sub> O (50 : 50 v/v) | Hg <sup>2+</sup>                                       | 59        |
|  | 0.044                | fluorescent probes               | Turn on        | in PBS buffer                                     | none                                                   | 60        |

|                                                                                   |      |                      |         |                       |      |            |
|-----------------------------------------------------------------------------------|------|----------------------|---------|-----------------------|------|------------|
| 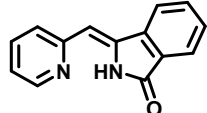 | 2.82 | Colorimetric Sensors | Turn on | EtOH/H <sub>2</sub> O | none | This study |
|-----------------------------------------------------------------------------------|------|----------------------|---------|-----------------------|------|------------|

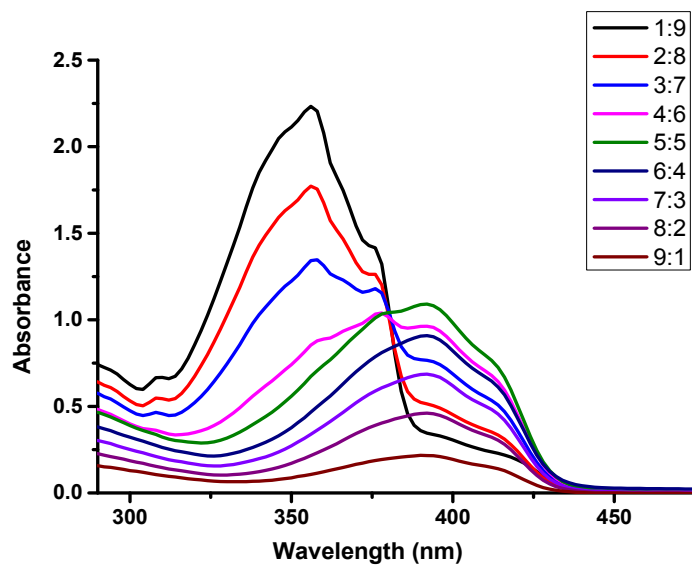

**Figure S3.** The molar ratio  $[Cu^{2+}]/[L]$ . The total concentration of  $Cu^{2+}$  with receptor L was  $5.0 \times 10^{-5}$  M.

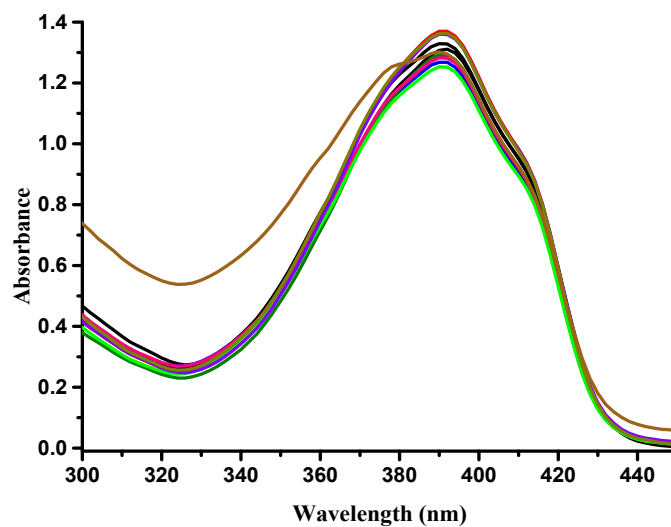

**Figure S4.** UV-vis selectivity-competition study of receptor L with added M(II) salts (5.0 equiv) followed by 1.0 equiv of added Cu(II) ( $[L] = 5.0 \times 10^{-5}$  M).

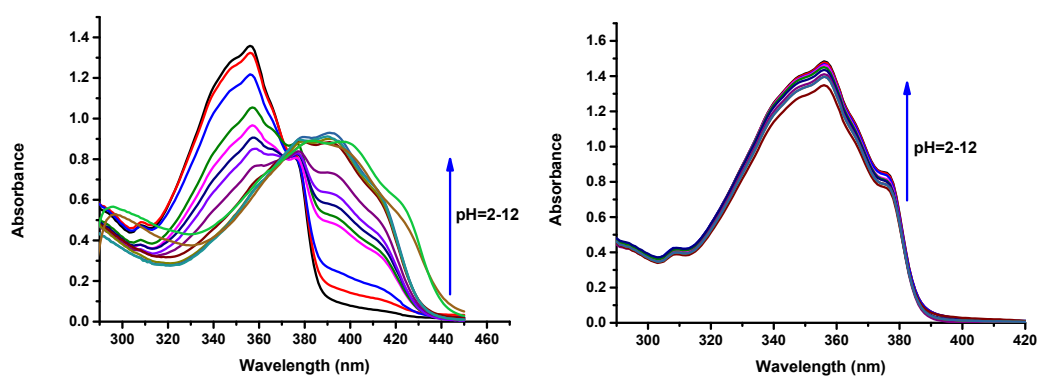

**Figure S5.** UV-vis absorption spectra of  $L-Cu^{2+}$ ,  $L$  in  $EtOH/H_2O=4:1$  solution over a range of  $pH=2-12$  at room temperature.

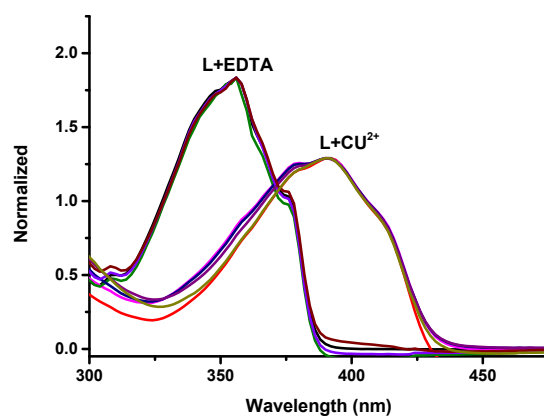

**Figure S6.** (a) (b) The cycle of  $L-Cu^{2+}$  and  $Cu^{2+}-EDTA$

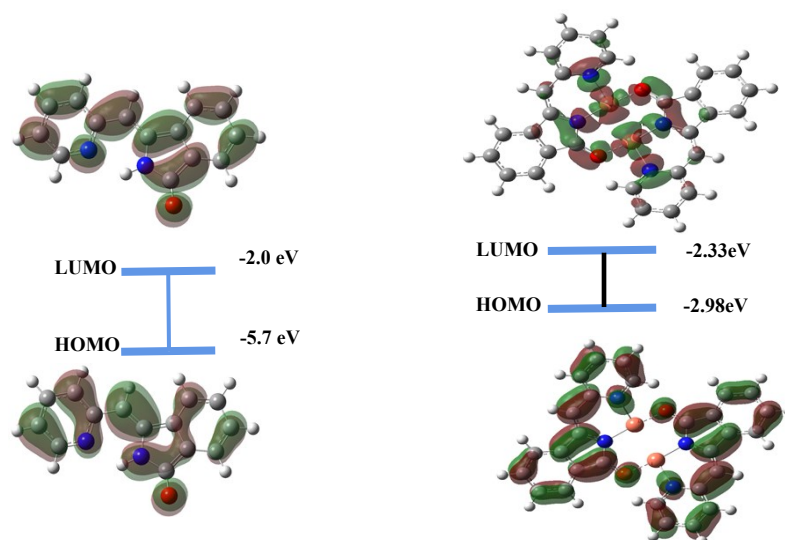

**Figure S7.** LUMO and HOMO orbitals for  $L$  and  $L-Cu^{2+}$ . The red and green lobes represent the

positive and negative signs of the coefficients of the molecular orbitals.

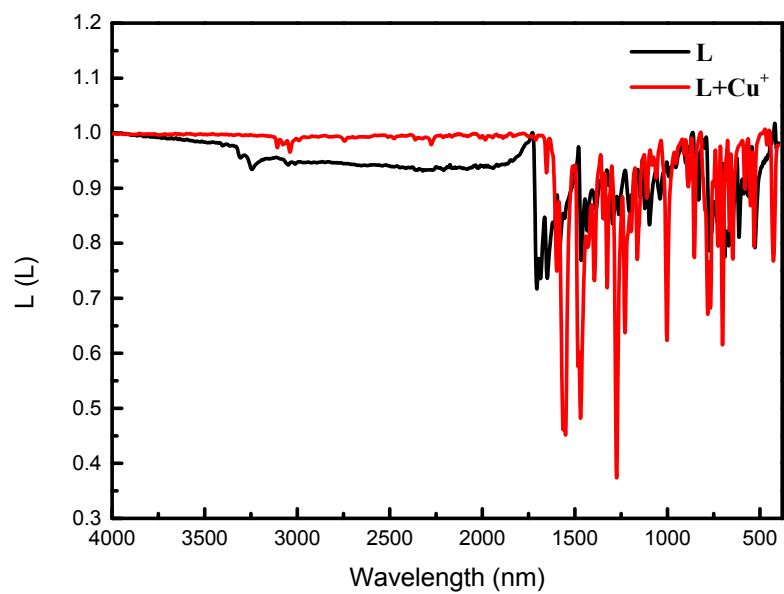

Figure S8. FT-IR spectrum of L and [L- Cu<sup>2+</sup>] complex.

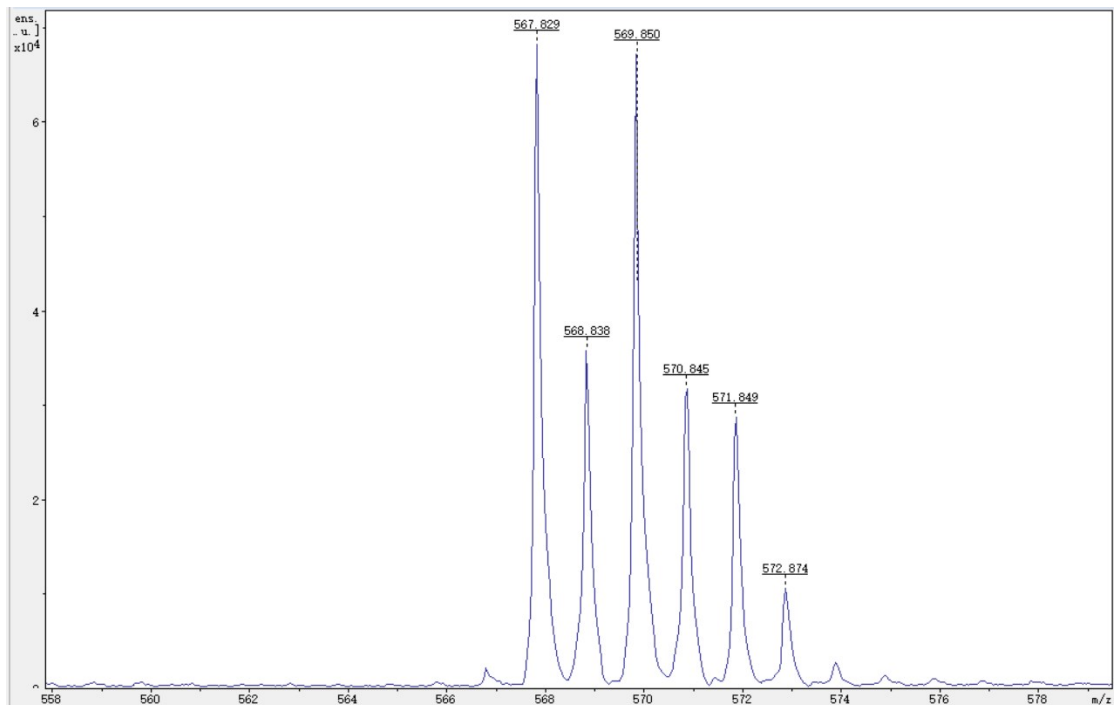

Figure S9. MALDI-TOF spectrum of [L+ Cu(II)] complex.

---

---
